# Supplementary material
Source: PubMed Central journal article supplement (PMC4597149)
Supplement: supp_M115.047928_mcp.M115.047928-12.pdf [file supp_M115.047928_mcp.M115.047928-12.pdf]

## Supplementary data 1

For biological replicate, same procedure was used to prepare samples as described in the manuscript except that, channels 114 and 115 were used to label peptides from PC3 cell lines and channel 116 was used to label peptides from LNCap cell lines.

In the biological replicate, the proteins identified, glycosites identified, glycoproteins identified using SPEG and final glycopeptides identified in global analysis are in table 8-11, respectively.

Protein changes involved in glycan biosynthesis identified in LNCap and PC3 cells via proteomics are summarized in the following table for original experiment (Run1) and the biologically repeated experiment (Run2):

| Accession | Description                                                                           | Run1      | Run2      |
|-----------|---------------------------------------------------------------------------------------|-----------|-----------|
|           |                                                                                       | PC3/LNCap | PC3/LNCap |
| 20302153  | hyaluronan synthase 3 isoform a                                                       | 6.27      | 3.00      |
| 34447231  | bifunctional 3'-phosphoadenosine 5'-phosphosulfate synthase 2 isoform a               | 3.46      | 3.09      |
| 21361621  | phosphoglucomutase-1 isoform 1                                                        | 3.45      | 2.18      |
| 30410726  | <b>alpha-(1,6)-fucosyltransferase</b>                                                 | 3.41      | 3.07      |
| 4502343   | UDP-GalNAc:beta-1,3-N-acetylgalactosaminyltransferase 1                               | 2.76      | 2.67      |
| 190014632 | bifunctional UDP-N-acetylglucosamine 2-epimerase/N-acetylmannosamine kinase isoform 1 | 2.71      | 3.17      |
| 11321585  | guanine nucleotide-binding protein G(I)/G(S)/G(T) subunit beta-1                      | 2.29      | 1.94      |
| 194097330 | hexokinase-3                                                                          | 2.27      | 1.77      |
| 42516563  | UDP-glucuronic acid decarboxylase 1 isoform 2                                         | 2.13      | 1.90      |
| 240255483 | extracellular sulfatase Sulf-2 isoform a                                              | 2.11      | 5.90      |
| 13027378  | glucosamine-6-phosphate isomerase 1                                                   | 2.02      | 0.34      |
| 189011548 | acid ceramidase isoform a                                                             | 0.49      | 0.27      |
| 109148550 | N-acylethanolamine-hydrolyzing acid amidase isoform 1                                 | 0.46      | 0.17      |

|           |                                                                        |      |      |
|-----------|------------------------------------------------------------------------|------|------|
| 4505235   | mannose-6-phosphate isomerase                                          | 0.45 | 0.24 |
| 189011550 | acid ceramidase isoform c                                              | 0.45 | 0.27 |
| 4504373   | beta-hexosaminidase subunit beta                                       | 0.43 | 0.23 |
| 119360348 | tissue alpha-L-fucosidase                                              | 0.42 | 0.36 |
| 285002251 | N(4)-(beta-N-acetylglucosaminy)-L-asparaginase isoform 1 preproprotein | 0.42 | 0.62 |
| 38026892  | dolichyl pyrophosphate Man9GlcNAc2 alpha-1,3-glucosyltransferase       | 0.38 | 0.44 |
| 4507303   | sulfotransferase 1A2                                                   | 0.37 | 0.17 |
| 4758092   | di-N-acetylchitobiase                                                  | 0.36 | 0.16 |
| 189181666 | beta-hexosaminidase subunit alpha                                      | 0.34 | 0.10 |
| 66346698  | alpha-N-acetylglucosaminidase                                          | 0.32 | 0.27 |
| 29550921  | sulfotransferase 1A3/1A4                                               | 0.24 | 0.22 |

The data generated in the biological replicate verified our initial analysis, ratio of alpha-(1,6)-fucosyltransferase (FUT8) expression between PC3/LNCap was 3.41 in the original excrement and 3.07 in the biological replicate in Run2.

The intact glycopeptides, when identified and quantified with sufficient MS/MS spectra, showed consistent trend in the table below. The glycosite from adipocyte plasma membrane protein showed increased fucosylation and decreased oligomannose structures in PC3 cells comparing to LNCap cells.

This observation is consistent between replicate analyses.

| Peptide Sequence | HexNAc | Hexose | Fucose | PC3/LNCap |
|------------------|--------|--------|--------|-----------|
| AGPNGTLFVADAYK   | 3      | 3      | 1      | 2.68      |
| AGPNGTLFVADAYK   | 2      | 3      | 1      | 1.73      |
| AGPNGTLFVADAYK   | 2      | 3      | 1      | 2.19      |
| AGPNGTLFVADAYK   | 2      | 7      | 0      | 0.76      |
| AGPNGTLFVADAYK   | 2      | 6      | 0      | 0.19      |
| AGPNGTLFVADAYK   | 2      | 5      | 0      | 0.31      |
| AGPNGTLFVADAYK   | 2      | 5      | 0      | 0.43      |
| AGPNGTLFVADAYK   | 2      | 6      | 0      | 0.28      |
| AGPNGTLFVADAYK   | 2      | 5      | 0      | 0.20      |

|                         |   |   |   |      |
|-------------------------|---|---|---|------|
| NLEKNSTKQEILAALEK       | 2 | 5 | 1 | 0.86 |
| NLEKNSTKQEILAALEK       | 2 | 4 | 0 | 0.09 |
| NLEKNSTKQEILAALEK       | 2 | 3 | 0 | 0.12 |
| HNNDTQHIWESDSNEFSVIADPR | 5 | 3 | 1 | 1.27 |
| HNNDTQHIWESDSNEFSVIADPR | 3 | 3 | 1 | 2.02 |
| HNNDTQHIWESDSNEFSVIADPR | 2 | 3 | 1 | 1.46 |
| HNNDTQHIWESDSNEFSVIADPR | 4 | 3 | 1 | 1.84 |
| HNNDTQHIWESDSNEFSVIADPR | 2 | 3 | 1 | 2.12 |
| HNNDTQHIWESDSNEFSVIADPR | 2 | 5 | 0 | 1.69 |
| HNNDTQHIWESDSNEFSVIADPR | 2 | 5 | 0 | 1.44 |
| HNNDTQHIWESDSNEFSVIADPR | 2 | 5 | 0 | 0.81 |
| HNNDTQHIWESDSNEFSVIADPR | 2 | 6 | 0 | 0.48 |
| HNNDTQHIWESDSNEFSVIADPR | 2 | 6 | 0 | 0.48 |
| HNNDTQHIWESDSNEFSVIADPR | 2 | 6 | 0 | 0.32 |
| HNNDTQHIWESDSNEFSVIADPR | 2 | 6 | 0 | 0.42 |
| HNNDTQHIWESDSNEFSVIADPR | 2 | 6 | 0 | 0.64 |
| HNNDTQHIWESDSNEFSVIADPR | 2 | 6 | 0 | 0.51 |
| HNNDTQHIWESDSNEFSVIADPR | 2 | 6 | 0 | 0.49 |
| HNNDTQHIWESDSNEFSVIADPR | 2 | 6 | 0 | 0.39 |
| HNNDTQHIWESDSNEFSVIADPR | 2 | 6 | 0 | 0.42 |
| HNNDTQHIWESDSNEFSVIADPR | 2 | 7 | 0 | 0.73 |
| HNNDTQHIWESDSNEFSVIADPR | 2 | 7 | 0 | 0.82 |
| HNNDTQHIWESDSNEFSVIADPR | 2 | 7 | 0 | 0.73 |
| HNNDTQHIWESDSNEFSVIADPR | 2 | 8 | 0 | 0.56 |
| HNNDTQHIWESDSNEFSVIADPR | 2 | 8 | 0 | 0.56 |
| HNNDTQHIWESDSNEFSVIADPR | 2 | 8 | 0 | 0.48 |
| HNNDTQHIWESDSNEFSVIADPR | 2 | 8 | 0 | 0.66 |
| HNNDTQHIWESDSNEFSVIADPR | 2 | 8 | 0 | 0.62 |
| HNNDTQHIWESDSNEFSVIADPR | 2 | 8 | 0 | 0.71 |
| HNNDTQHIWESDSNEFSVIADPR | 2 | 8 | 0 | 0.86 |
| HNNDTQHIWESDSNEFSVIADPR | 2 | 9 | 0 | 0.35 |
